# Supplementary material for: Enhanced Growth and Activities of the Dominant Functional Microbiota of Chicken Manure Composts in the Presence of Maize Straw
Source: PubMed Central journal article supplement (PMC5986910; doi:10.3389/fmicb.2018.01131), 2018-05-29
Supplement: Data_Sheet_1.pdf [file Data_Sheet_1.pdf]

*Supplementary Material*

**Enhanced growth and activities of the dominant functional  
microbiota of chicken manure composts in the presence of  
maize straw**

**Lili Zhang<sup>1,3</sup>, Lijuan Li<sup>1</sup>, Xiaoguang Pan<sup>1</sup>, Zelu Shi<sup>1</sup>, Xihong Feng<sup>2</sup>, Bin Gong<sup>3</sup>,  
Jian Li<sup>4</sup> and Lushan Wang<sup>1\*</sup>**

<sup>1</sup>State Key Laboratory of Microbial Technology, Shandong University, Jinan, China;

<sup>2</sup>Lu Qing Seed Co. Ltd., Jinan, China;

<sup>3</sup>School of Computer Science and Technology, Shandong University, Jinan, China;

<sup>4</sup>Laboratory of Antimicrobial Systems Pharmacology, Monash Biomedicine  
Discovery Institute, Department of Microbiology, Monash University, Australia

\* **Correspondence:** Prof. Lushan Wang, lswang@sdu.edu.cn

Table S1. Sample origin of the compost samples.<sup>a</sup>

| Sample origin                                    | Sample name |        |        | Sampling time |
|--------------------------------------------------|-------------|--------|--------|---------------|
| Chicken manure compost<br>(CM)                   | CM0-1       | CM0-2  | CM0-3  | day 0         |
|                                                  | CM4-1       | CM4-2  | CM4-3  | day 4         |
|                                                  | CM8-1       | CM8-2  | CM8-3  | day 8         |
|                                                  | CM16-1      | CM16-2 | CM16-3 | day 16        |
|                                                  | CM24-1      | CM24-2 | CM24-3 | day 24        |
|                                                  | CM32-1      | CM32-2 | CM32-3 | day 32        |
|                                                  | CM40-1      | CM40-2 | CM40-3 | day 40        |
| Chicken manure compost<br>added maize straw (CS) | CS0-1       | CS0-2  | CS0-3  | day 0         |
|                                                  | CS4-1       | CS4-2  | CS4-3  | day 4         |
|                                                  | CS8-1       | CS8-2  | CS8-3  | day 8         |
|                                                  | CS16-1      | CS16-2 | CS16-3 | day 16        |
|                                                  | CS24-1      | CS24-2 | CS24-3 | day 24        |
|                                                  | CS32-1      | CS32-2 | CS32-3 | day 32        |
|                                                  | CS40-1      | CS40-2 | CS40-3 | day 40        |

<sup>a</sup>Abbreviations: CM, chicken manure compost; CS, chicken manure compost added maize straw; number means the day on which the samples were collected.

Table S2. Overview of pyrosequencing data.

| sequence information |                 |             |             |            |            | diversity index |          |          |          |          |      |
|----------------------|-----------------|-------------|-------------|------------|------------|-----------------|----------|----------|----------|----------|------|
| Sample               | Sequence number | Base number | Mean length | Min length | Max length | ace             | chao     | coverage | shannon  | simpson  | sobs |
| CM0_1                | 41574           | 18588461    | 447.1175    | 328        | 500        | 482.244         | 485.2174 | 0.997183 | 3.448934 | 0.085224 | 384  |
| CM0_2                | 41368           | 18477884    | 446.671     | 336        | 499        | 505.4037        | 519.8    | 0.997311 | 3.468079 | 0.100607 | 412  |
| CM0_3                | 43360           | 19420983    | 447.9009    | 218        | 495        | 546.5263        | 515.0909 | 0.997646 | 3.16032  | 0.175228 | 374  |
| CM4_1                | 43589           | 19455439    | 446.3383    | 341        | 499        | 635.6364        | 591      | 0.997    | 3.604612 | 0.061043 | 421  |
| CM4_2                | 31890           | 14240915    | 446.5637    | 347        | 505        | 529.7883        | 529      | 0.996229 | 4.056009 | 0.041767 | 426  |
| CM4_3                | 32474           | 14564607    | 448.5006    | 396        | 497        | 448.2467        | 443.9184 | 0.99663  | 3.657622 | 0.063583 | 364  |
| CM8_1                | 38173           | 17130326    | 448.755     | 276        | 505        | 407.9521        | 409.0244 | 0.997285 | 3.144001 | 0.126477 | 324  |
| CM8_2                | 37077           | 16669346    | 449.5872    | 381        | 504        | 456.7588        | 434.7759 | 0.996884 | 2.735043 | 0.125736 | 337  |
| CM8_3                | 44631           | 19963691    | 447.3055    | 388        | 503        | 427.9652        | 448.8857 | 0.997617 | 3.605571 | 0.059965 | 354  |
| CM16_1               | 36905           | 16604811    | 449.9339    | 396        | 460        | 475.1167        | 389.037  | 0.997228 | 1.936235 | 0.278359 | 234  |
| CM16_2               | 33838           | 15197519    | 449.1258    | 378        | 501        | 423.5593        | 439.3    | 0.997069 | 2.939673 | 0.14869  | 265  |
| CM16_3               | 32878           | 14779174    | 449.5156    | 343        | 461        | 350.7949        | 345.025  | 0.997303 | 2.354849 | 0.234604 | 268  |
| CM24_1               | 35397           | 15882877    | 448.7069    | 339        | 487        | 429.4635        | 417.6538 | 0.997047 | 3.563716 | 0.058055 | 349  |
| CM24_2               | 40526           | 18229406    | 449.82      | 396        | 502        | 449.7277        | 420.8125 | 0.997335 | 2.90384  | 0.118897 | 290  |
| CM24_3               | 43292           | 19471477    | 449.7708    | 304        | 495        | 337.9037        | 334.5526 | 0.997992 | 2.778539 | 0.124802 | 271  |
| CM32_1               | 35759           | 16076821    | 449.5881    | 327        | 498        | 452.3197        | 429.5333 | 0.997352 | 3.164701 | 0.086215 | 299  |
| CM32_2               | 40373           | 18162329    | 449.8633    | 403        | 499        | 357.7529        | 341.4348 | 0.997513 | 2.049942 | 0.368927 | 271  |
| CM32_3               | 40041           | 18018136    | 449.9922    | 237        | 496        | 533.6996        | 452.1538 | 0.996991 | 2.800169 | 0.127863 | 304  |
| CM40_1               | 40463           | 18128936    | 448.0374    | 356        | 502        | 445.1734        | 454.0256 | 0.997283 | 3.905407 | 0.047514 | 373  |
| CM40_2               | 35878           | 15850106    | 441.7779    | 292        | 489        | 481.8637        | 497.3488 | 0.996181 | 4.057731 | 0.037199 | 400  |

---

|        |       |          |          |     |     |          |          |          |          |          |     |
|--------|-------|----------|----------|-----|-----|----------|----------|----------|----------|----------|-----|
| CM40_3 | 32434 | 14315562 | 441.3752 | 343 | 468 | 510.9084 | 510      | 0.996622 | 3.953163 | 0.044777 | 411 |
| CS0_1  | 38688 | 17334939 | 448.0702 | 340 | 496 | 645.6845 | 648.3088 | 0.994888 | 4.263906 | 0.034533 | 525 |
| CS0_2  | 41776 | 18663336 | 446.7478 | 304 | 503 | 809.9758 | 842.28   | 0.995134 | 4.595649 | 0.024881 | 679 |
| CS0_3  | 39039 | 17447290 | 446.9195 | 358 | 502 | 754.9659 | 755.686  | 0.99463  | 4.268145 | 0.044629 | 624 |
| CS4_1  | 37674 | 16841666 | 447.0368 | 358 | 500 | 723.0439 | 763.1194 | 0.994121 | 3.926731 | 0.059984 | 578 |
| CS4_2  | 39887 | 17795114 | 446.1382 | 392 | 499 | 807.4153 | 790.7238 | 0.995975 | 4.320886 | 0.05552  | 702 |
| CS4_3  | 44524 | 19948112 | 448.0305 | 380 | 503 | 777.2996 | 781.2593 | 0.995359 | 4.16122  | 0.052928 | 632 |
| CS8_1  | 44184 | 19763633 | 447.3029 | 340 | 499 | 784.0233 | 801.5556 | 0.995784 | 3.664823 | 0.116584 | 658 |
| CS8_2  | 40862 | 18205637 | 445.5395 | 279 | 501 | 780.9182 | 769.8542 | 0.994627 | 4.02138  | 0.065571 | 655 |
| CS8_3  | 42577 | 18995272 | 446.1393 | 341 | 475 | 789.8523 | 800.6395 | 0.994313 | 4.201898 | 0.038959 | 649 |
| CS16_1 | 31710 | 14142306 | 445.9888 | 389 | 499 | 720.4147 | 745.1549 | 0.993468 | 3.900827 | 0.05498  | 566 |
| CS16_2 | 33898 | 15118738 | 446.0068 | 389 | 499 | 777.1499 | 709.1186 | 0.993879 | 3.090321 | 0.110478 | 477 |
| CS16_3 | 34760 | 15456011 | 444.6493 | 397 | 505 | 738.5787 | 761.0143 | 0.993481 | 3.764315 | 0.071738 | 563 |
| CS24_1 | 39643 | 17582231 | 443.5141 | 325 | 500 | 531.4783 | 538.3889 | 0.995742 | 3.781343 | 0.049009 | 417 |
| CS24_2 | 31647 | 14142450 | 446.8812 | 366 | 499 | 611.1465 | 546.4118 | 0.995036 | 3.504665 | 0.061437 | 392 |
| CS24_3 | 36116 | 16115390 | 446.2119 | 366 | 502 | 620.2928 | 626.75   | 0.994821 | 3.330666 | 0.072381 | 438 |
| CS32_1 | 30437 | 13463672 | 442.3456 | 317 | 497 | 677.6883 | 664.241  | 0.992931 | 4.567021 | 0.023017 | 552 |
| CS32_2 | 44189 | 19296419 | 436.6792 | 389 | 491 | 718.9072 | 742.0448 | 0.996197 | 4.298432 | 0.039648 | 613 |
| CS32_3 | 38391 | 17091939 | 445.2069 | 341 | 493 | 573.9452 | 564      | 0.994411 | 4.333695 | 0.027741 | 447 |
| CS40_1 | 31039 | 13731795 | 442.4046 | 268 | 494 | 728.2293 | 725.04   | 0.99515  | 5.083729 | 0.012638 | 633 |
| CS40_2 | 35563 | 15651680 | 440.1114 | 287 | 502 | 678.9463 | 707.9672 | 0.995003 | 4.450016 | 0.026749 | 553 |
| CS40_3 | 36114 | 15949963 | 441.656  | 321 | 488 | 743.7269 | 771.0159 | 0.995031 | 4.935164 | 0.016025 | 642 |

---

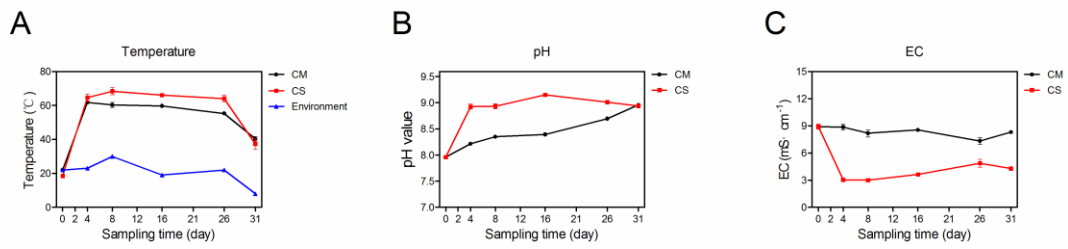

Fig. S1. Physicochemical properties of compost samples. This experiment was done in June, 2015. The data and error bars are the mean and standard deviation of three subsamples. A, B and C show the temperature, pH and EC of compost samples, respectively. CM, middle layer (~20 cm depth) of chicken manure compost. CS, middle layer (~20 cm depth) of chicken manure compost with added maize straw. Environment, environmental temperature.

A

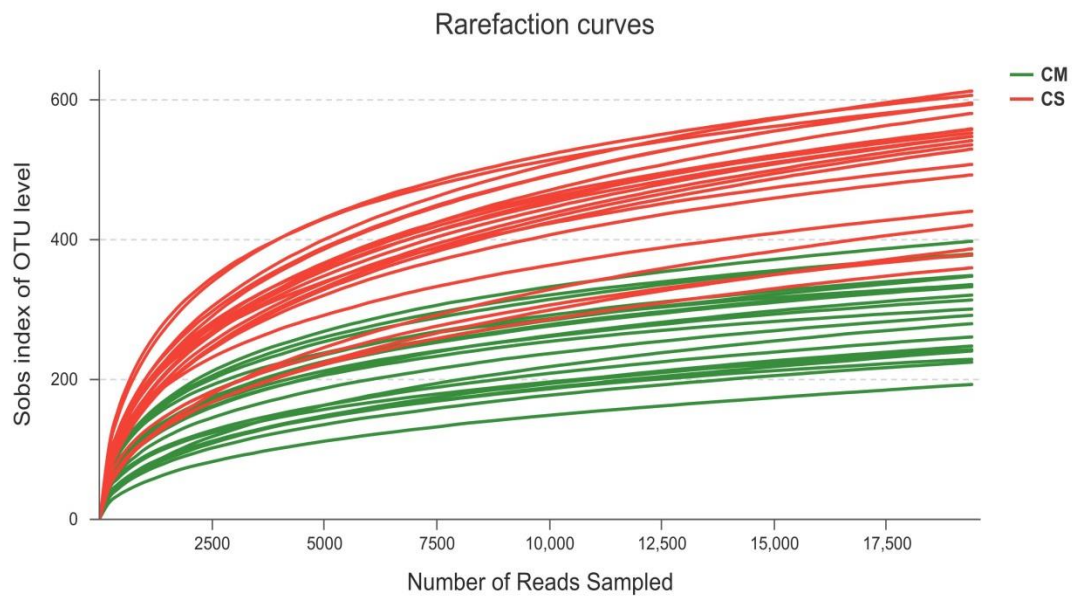

B

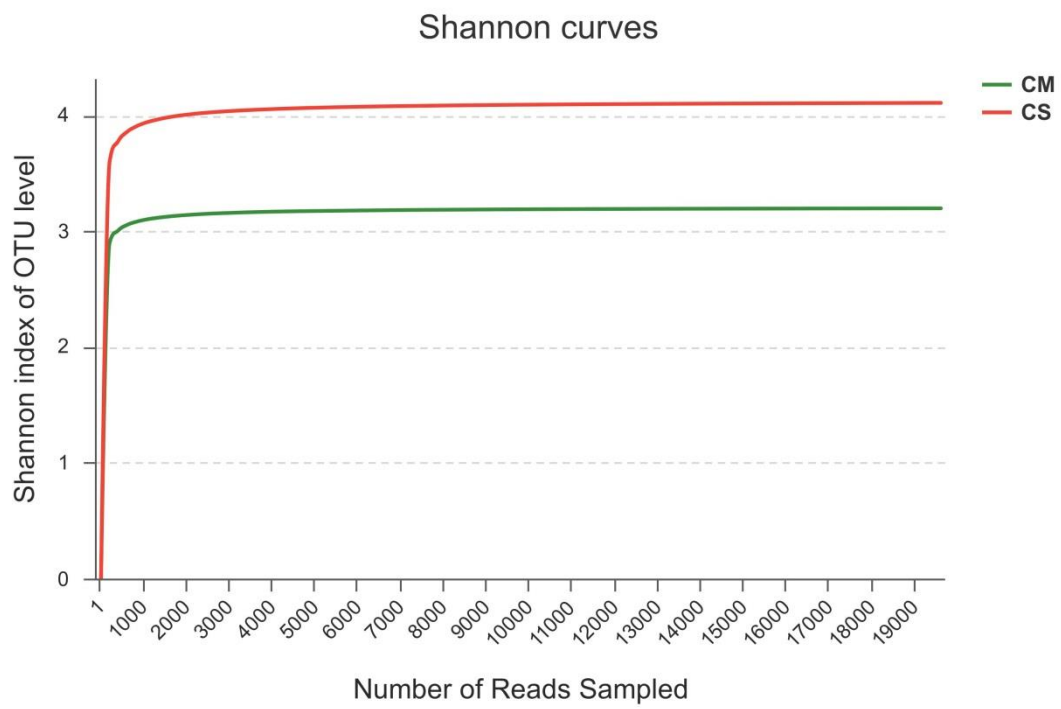

Fig. S2. The average rarefaction curve representing variation of the Sobs (A) and Shannon diversity index (B) at increasing sequencing depth of compost samples.

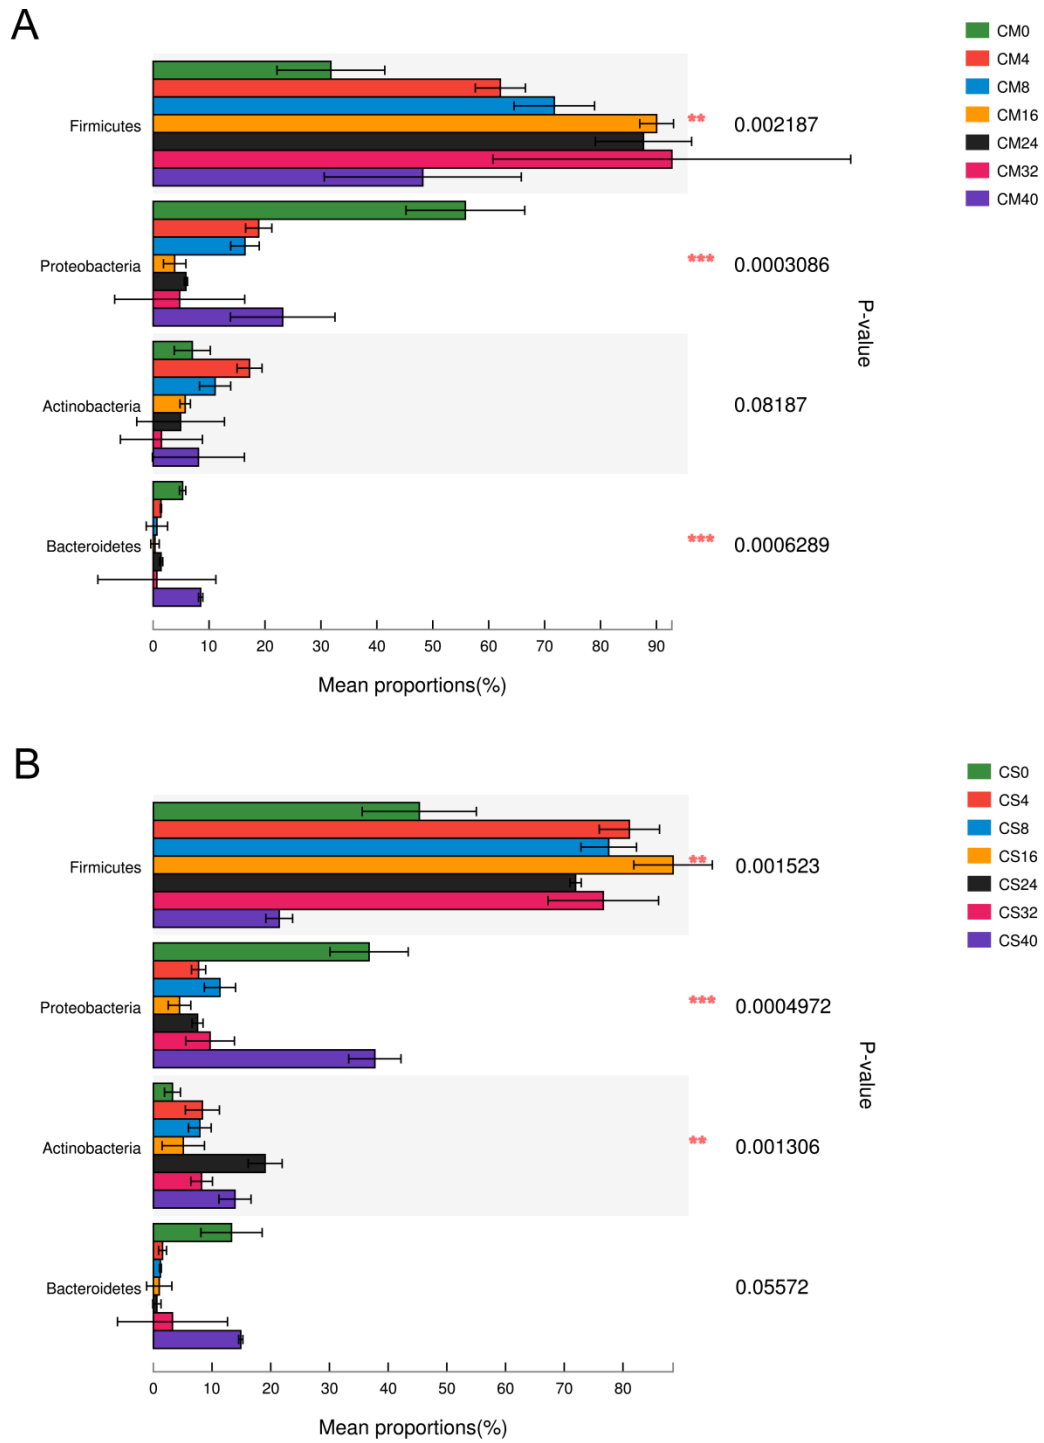

Fig. S3. The phylum level composition of the microbiota in CM (A) and CS (B). One-way ANOVA analysis was applied on the computation of the abundance changes.

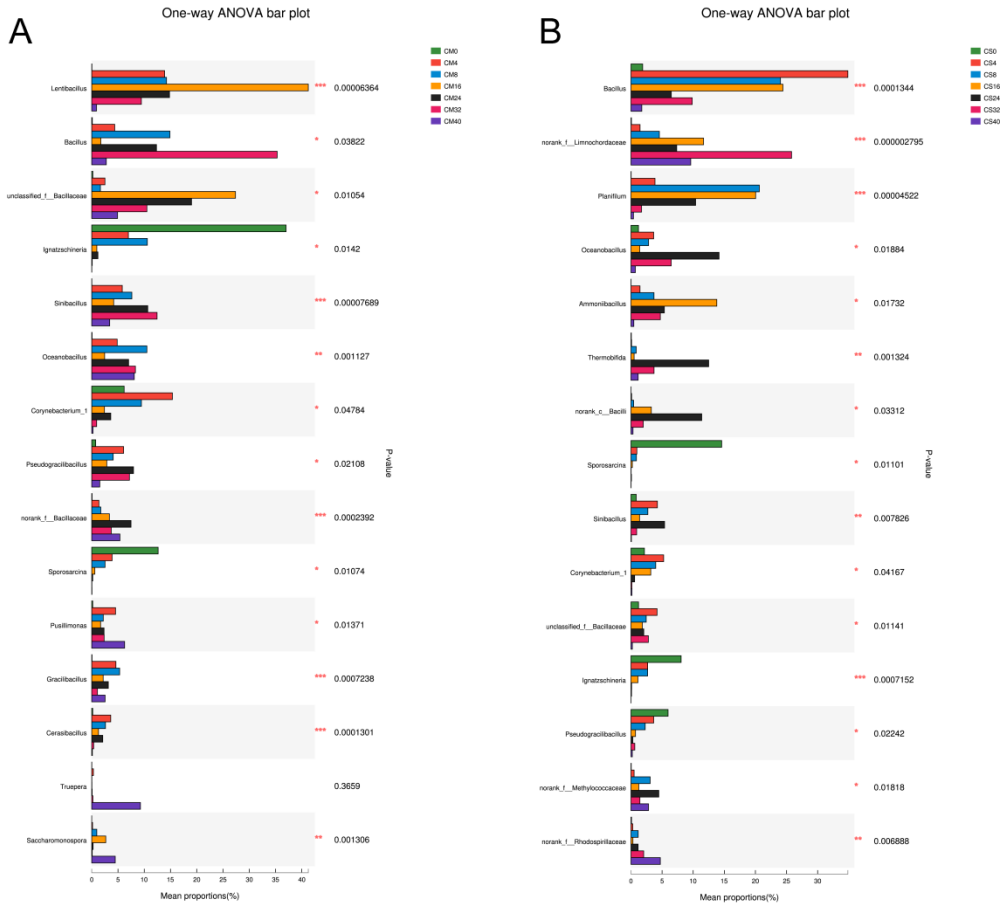

Fig. S4. The genus level composition of the microbiota in CM (A) and CS (B). One-way ANOVA analysis was applied on the computation of the abundance changes.



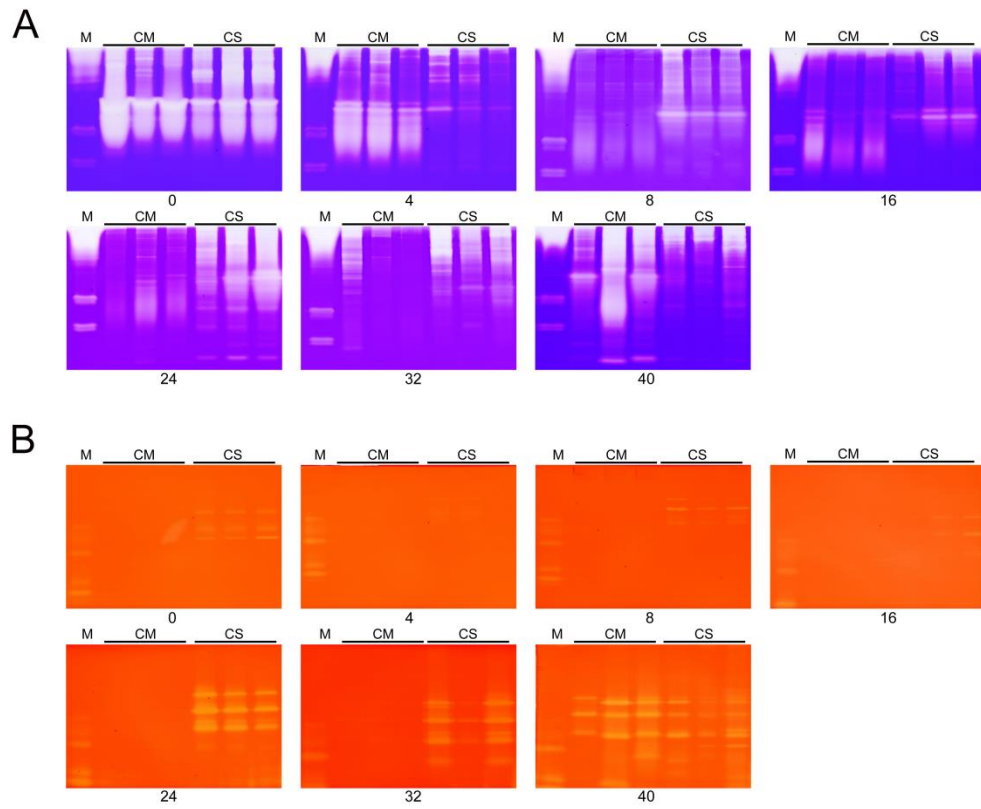

Fig. S5. Zymogram of the proteases (A) and extracellular endoglucanases (B) from samples in CM and CS. CM, middle layer (~20 cm depth) of chicken manure compost. CS, middle layer (~20 cm depth) of chicken manure compost with added maize straw. M, the crude enzymes of *Aspergillus niger* AN76. Numbers indicate the sampling day.

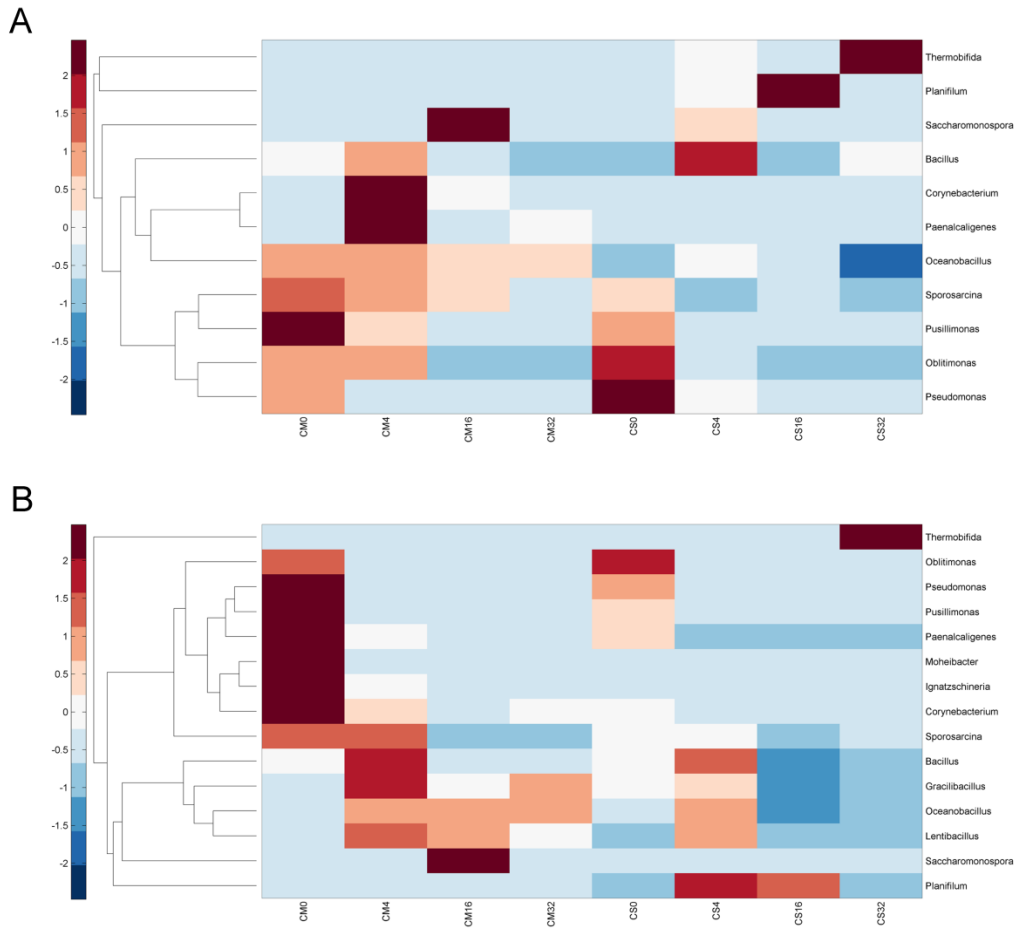

Fig. S6. Heatmap of the relative abundance of predicted extracellular proteins secreted by dominant genera of CM (A) and CS (B) samples. Color represented the relative abundance, which increased from green to red.

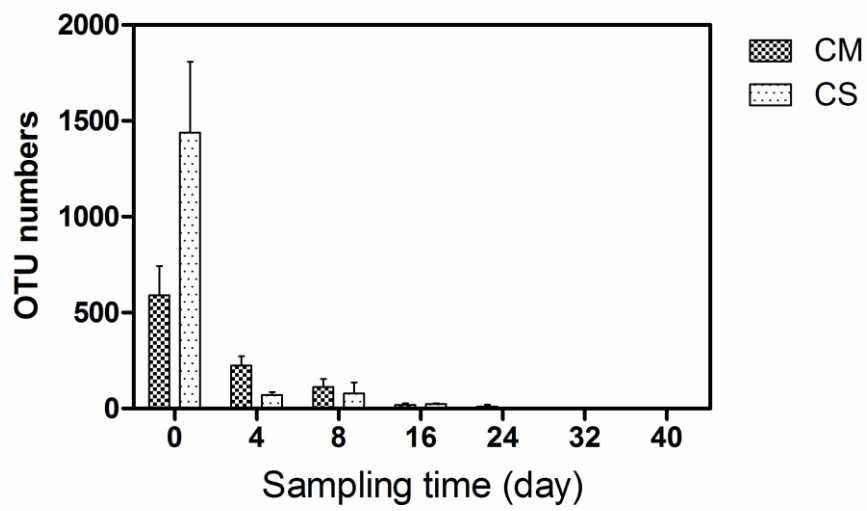

Fig. S7. The detected OTU numbers of the genus *Oblitimonas* in CM and CS samples along with composting time.

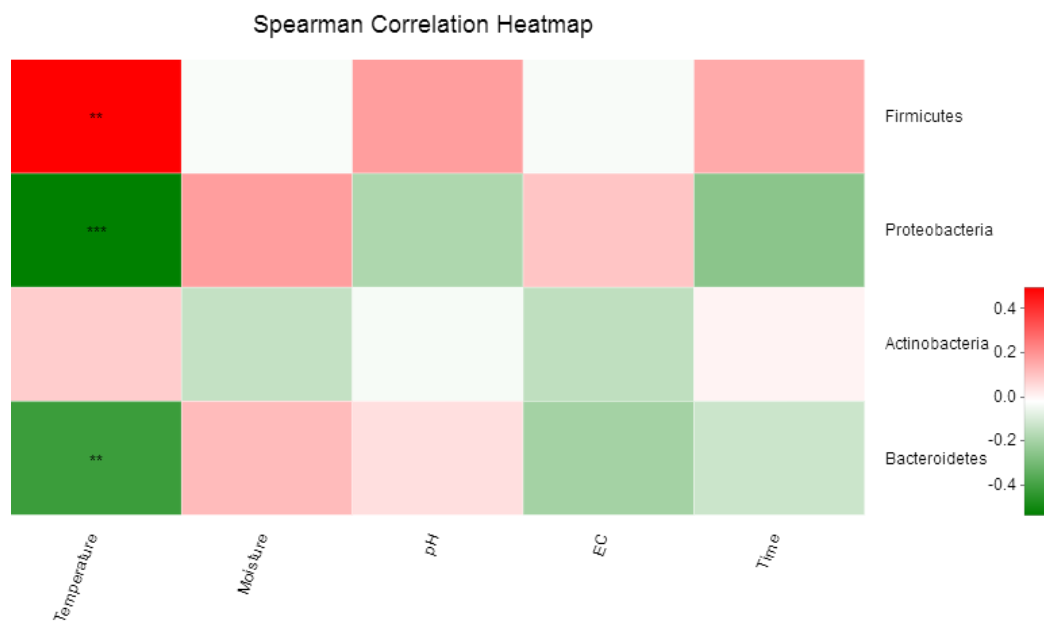

Fig. S8. Heatmap of correlation between microbial communities and different environmental factors. Color represented the correlation degree, the degree increased from green to red. Temperature, moisture, pH, EC and composting time were considered in this analysis as environmental factors. The four dominant phyla in Fig. 2 were chosen.

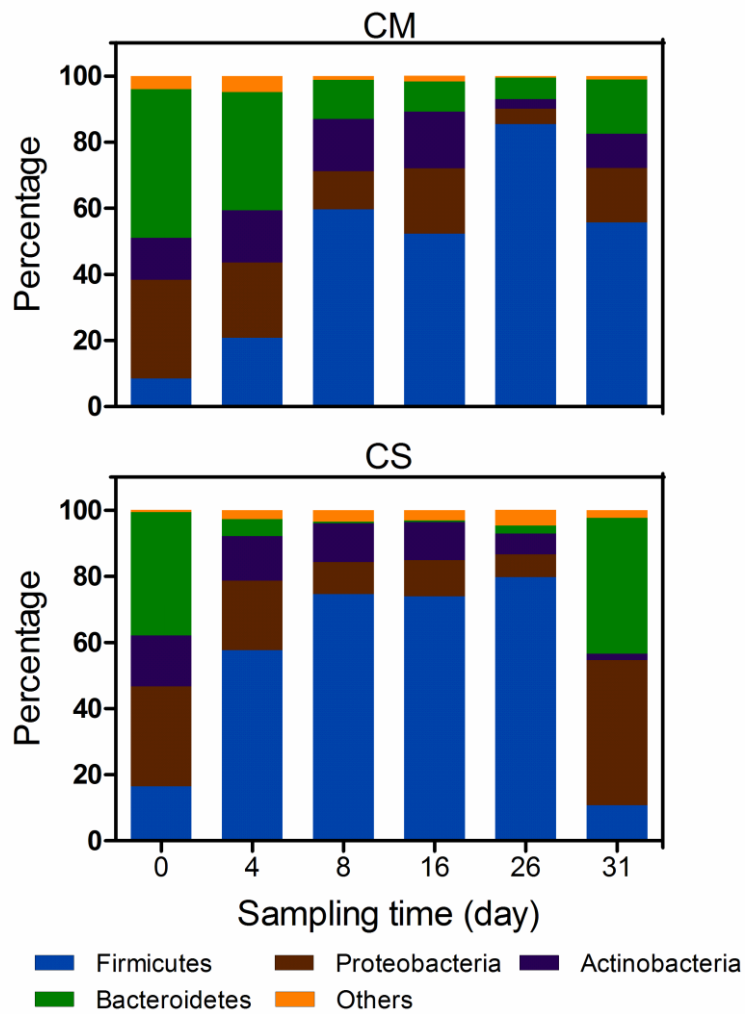

Fig. S9. Phylum level composition of microbial communities of compost samples. Color coded bar plot represents the average abundance of bacterial phyla across different composting time. CM, middle layer (~20 cm depth) of chicken manure compost. CS, middle layer (~20 cm depth) of chicken manure compost with added maize straw. Others, phyla with relative abundances less than 1% were classified into this category. Sequencing data generated in this study have been deposited at the NCBI Sequence Read Archive under accession codes SRP078780 and SRP078783.

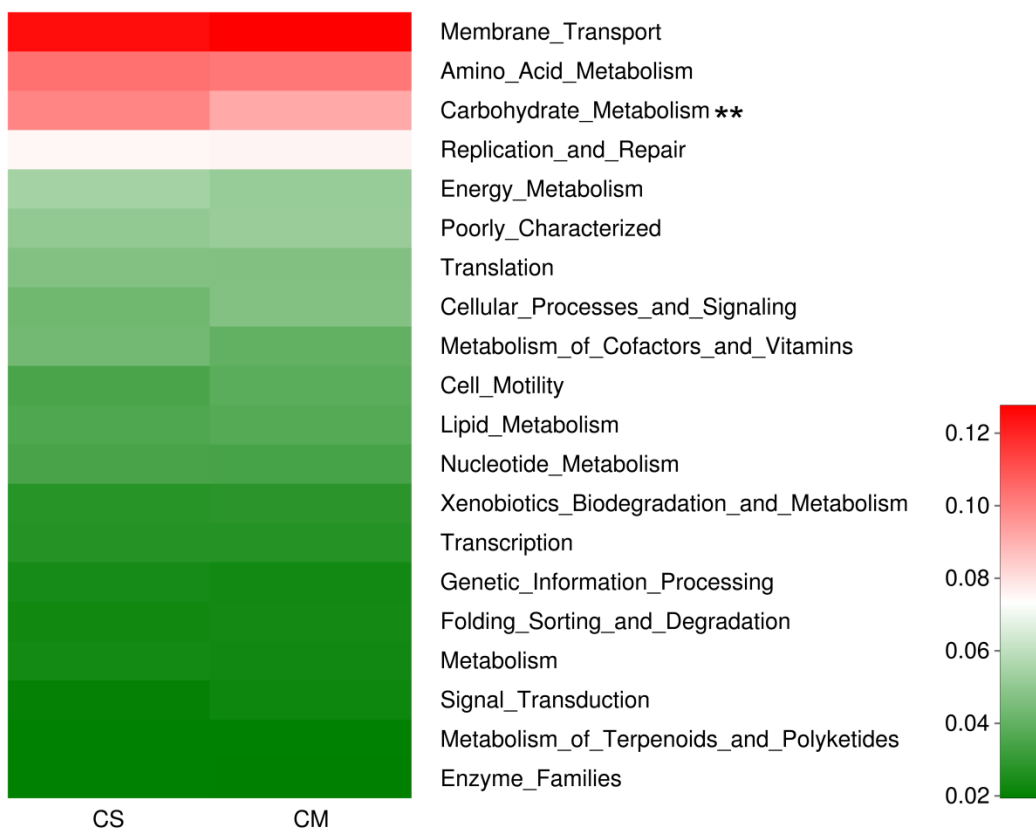

Fig. S10. Heatmap of the relative abundance of predicted functions of CM and CS samples based on the PICRUSt. Color represented the relative abundance, which increased from green to red. Asterisk represents significant difference of relative abundance of corresponding function between these two piles. Functions with relative abundance more than 1% were listed here.

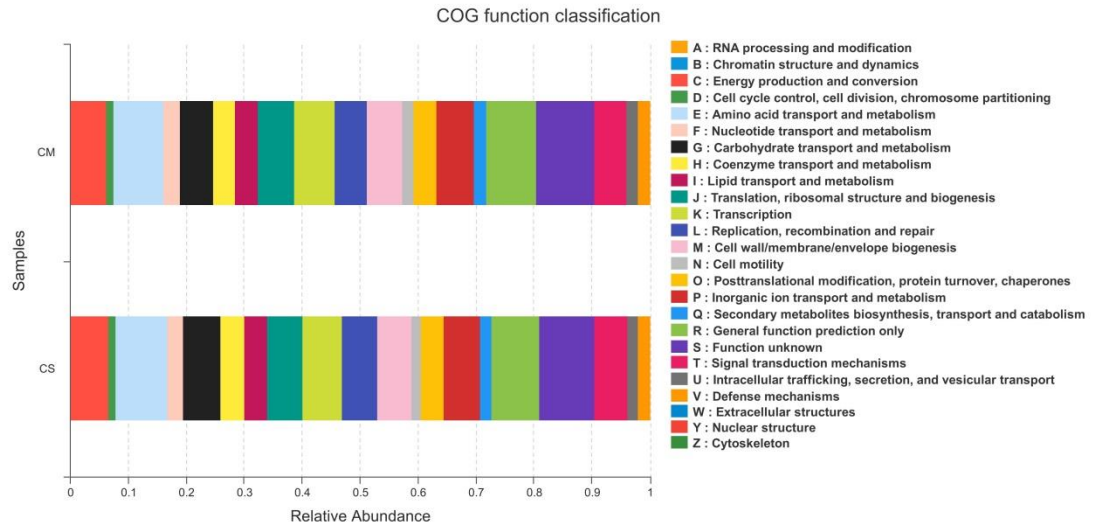

Fig. S11. Predicted functions of CM and CS samples based on the PICRUSt.

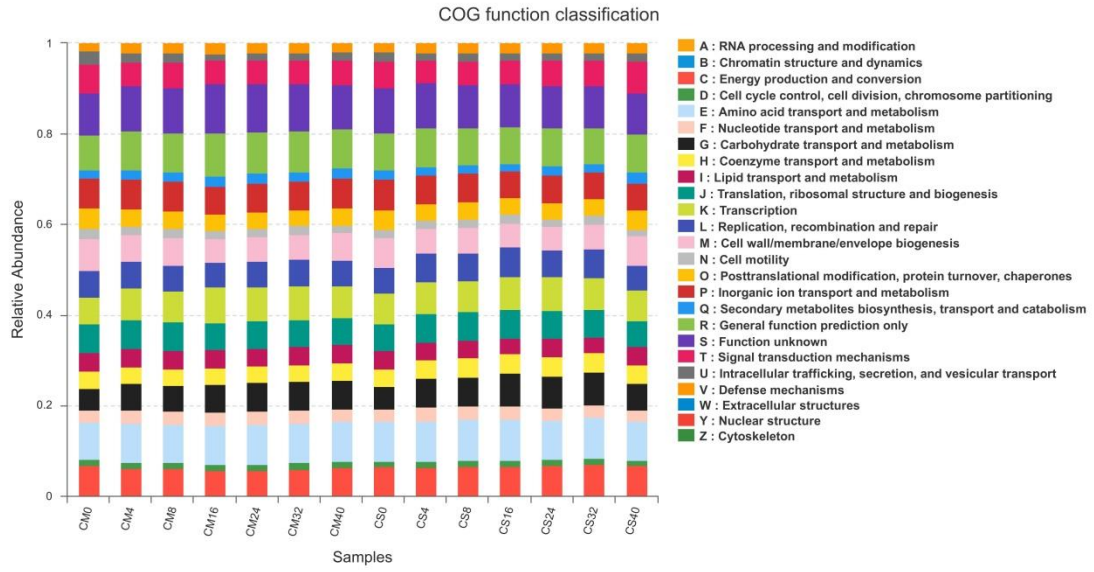

Fig. S12. Predicted functions of CM and CS samples at different sampling times based on the PICRUSt.
